# Supplementary material
Source: publisher site journal article supplement (https://cdn.bio-protocol.org/journal/static/5077_Supplementary%20information.zip)
Supplement: Supplementary file 1 [file 5077_Supplementary%20information.zip]

Archive with 6 entries (5 files):
- Supplementary information/Supplemental File S1.stl
- Supplementary information/Supplemental File S2.pdf
- Supplementary information/Supplemental File S3.pdf
- Supplementary information/Supplemental File S4.pdf
- Supplementary information/Supplemental File S5.pdf
- Supplementary information/
