# Supplementary material
Source: publisher site journal article supplement (https://cdn.bio-protocol.org/journal/static/5077_Supplementary%20information.zip)
Supplement: Supplementary file 1 [file 5077_Supplementary%20information.zip › Supplementary information/Supplemental File S2.pdf]

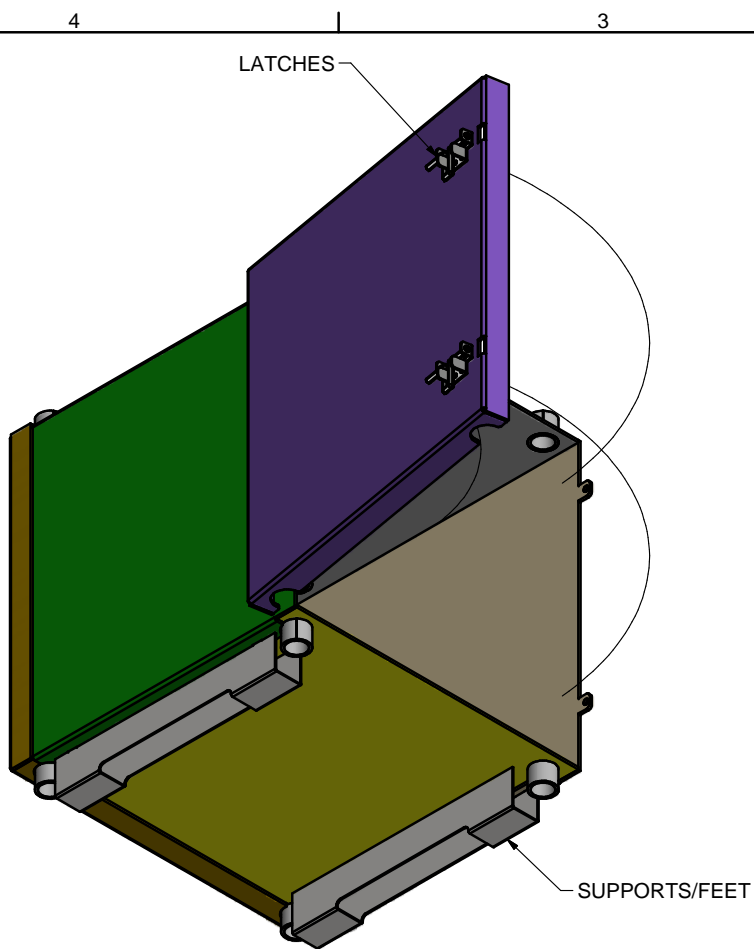

HINGED  
FRONT PANEL

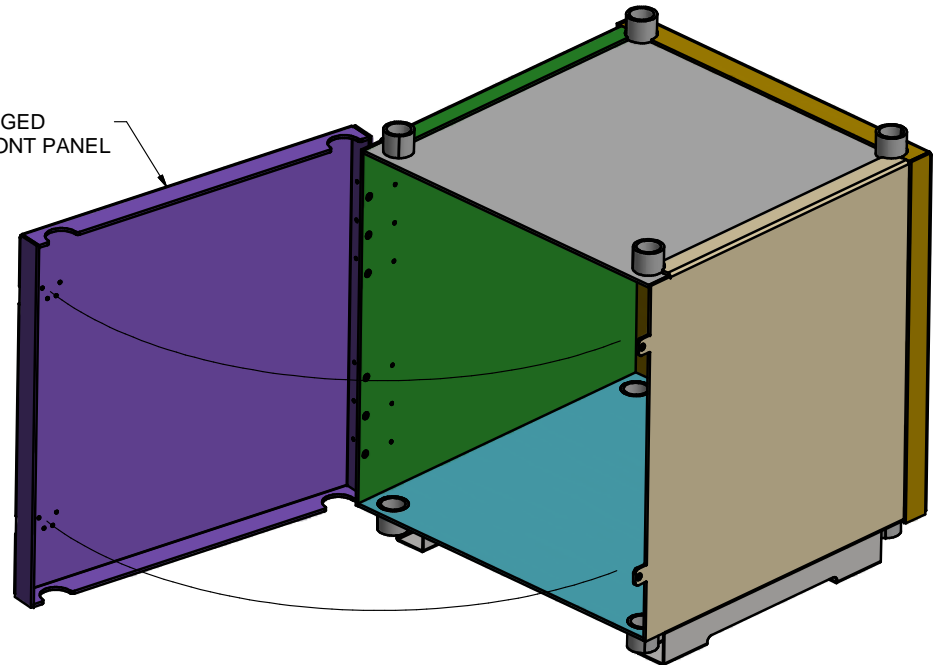

|                                                                                                                                                                                                                                                    |                                  |  |                                                                                                                                                                                         |  |                                    |  |                         |  |                      |  |           |  |
|----------------------------------------------------------------------------------------------------------------------------------------------------------------------------------------------------------------------------------------------------|----------------------------------|--|-----------------------------------------------------------------------------------------------------------------------------------------------------------------------------------------|--|------------------------------------|--|-------------------------|--|----------------------|--|-----------|--|
| UNLESS OTHERWISE SPECIFIED<br>DIMENSIONS ARE IN INCHES<br>TOLERANCES ARE:<br>FRACTIONS DECIMALS ANGLES<br><br>± 1/32 .XX ± ±.5<br><br>.XXX ±<br><br>MATERIAL:<br>ALLOY 4<br><br>THICKNESS: .125<br><br>FINISH:<br>NONE<br><br>DO NOT SCALE DRAWING | CUSTOMER DWG NO.<br>SKETCH REV.~ |  | <div>The MuShield Company, Inc.<br/>9 Ricker Ave., Londonderry, NH 03053<br/>P.O. Box 5045, Manchester, NH 03108<br/>Tel:603-666-4433 Fax:603-666-4013</div> <div><b>MuShield</b></div> |  |                                    |  |                         |  |                      |  |           |  |
|                                                                                                                                                                                                                                                    | TITLE:<br>MAG. SHIELD            |  |                                                                                                                                                                                         |  |                                    |  | TITLE                   |  |                      |  |           |  |
|                                                                                                                                                                                                                                                    | APPROVALS:                       |  | DATE:                                                                                                                                                                                   |  | <div>SHIELD BOX<br/>ASSEMBLY</div> |  |                         |  |                      |  |           |  |
|                                                                                                                                                                                                                                                    | DRAWN: R.W.S.                    |  | 2/12/2018                                                                                                                                                                               |  |                                    |  |                         |  |                      |  |           |  |
|                                                                                                                                                                                                                                                    | CHECKED: R.S.                    |  | J.M.C.                                                                                                                                                                                  |  |                                    |  |                         |  |                      |  |           |  |
|                                                                                                                                                                                                                                                    | MFG:                             |  |                                                                                                                                                                                         |  |                                    |  |                         |  |                      |  |           |  |
|                                                                                                                                                                                                                                                    | ENGR:                            |  |                                                                                                                                                                                         |  | SIZE<br>B                          |  | CODE IDENT.NO.<br>57284 |  | DRAWING NO.<br>S7444 |  | REV.<br>~ |  |
|                                                                                                                                                                                                                                                    | HEAT TREAT:<br>YES               |  |                                                                                                                                                                                         |  |                                    |  |                         |  |                      |  |           |  |
|                                                                                                                                                                                                                                                    | SCALE                            |  |                                                                                                                                                                                         |  | SHEET 1 OF 15                      |  |                         |  |                      |  |           |  |

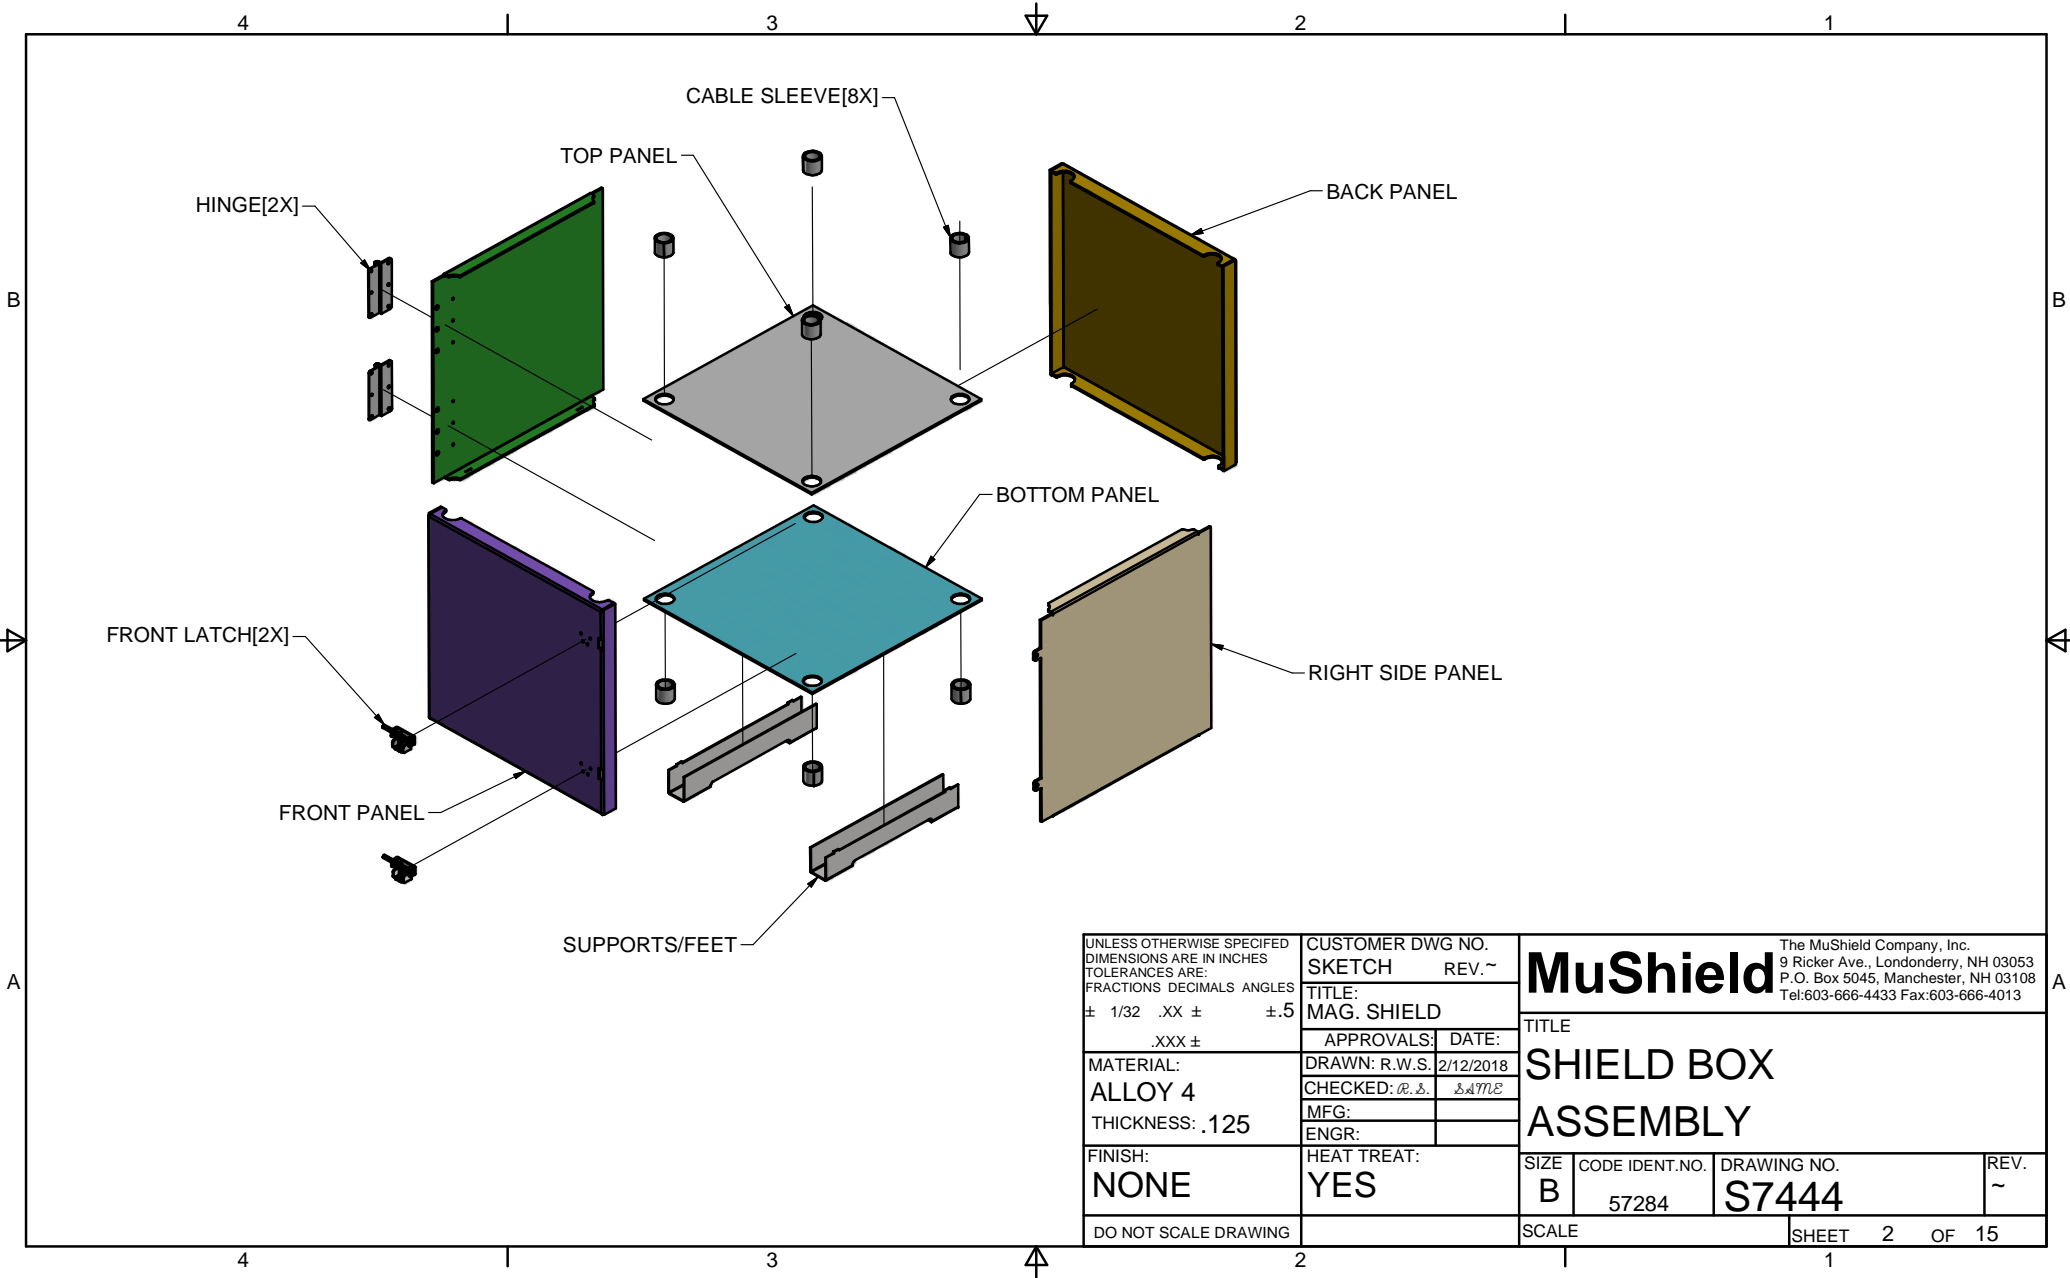

|                                                                                                                                      |                                   |  |                                                                                                                                                                                |  |                                           |  |                      |  |           |
|--------------------------------------------------------------------------------------------------------------------------------------|-----------------------------------|--|--------------------------------------------------------------------------------------------------------------------------------------------------------------------------------|--|-------------------------------------------|--|----------------------|--|-----------|
| UNLESS OTHERWISE SPECIFIED<br>DIMENSIONS ARE IN INCHES<br>TOLERANCES ARE:<br>FRACTIONS DECIMALS ANGLES<br>± 1/32 .XX ± ±.5<br>.XXX ± | CUSTOMER DWG NO.<br>SKETCH REV. ~ |  | <div>The MuShield Company, Inc.<br/>9 Ricker Ave., Londonderry, NH 03053<br/>P.O. Box 5045, Manchester, NH 03108<br/>Tel:603-666-4433 Fax:603-666-4013</div> <h1>MuShield</h1> |  |                                           |  |                      |  |           |
|                                                                                                                                      | TITLE:<br>MAG. SHIELD             |  |                                                                                                                                                                                |  |                                           |  |                      |  |           |
|                                                                                                                                      | APPROVALS:                        |  | DATE:                                                                                                                                                                          |  | TITLE<br><h2>SHIELD BOX<br/>ASSEMBLY</h2> |  |                      |  |           |
|                                                                                                                                      | DRAWN: R.W.S. 2/12/2018           |  |                                                                                                                                                                                |  |                                           |  |                      |  |           |
| CHECKED: R.S. JAME                                                                                                                   |                                   |  |                                                                                                                                                                                |  |                                           |  |                      |  |           |
| MFG:                                                                                                                                 |                                   |  |                                                                                                                                                                                |  |                                           |  |                      |  |           |
| MATERIAL:<br>ALLOY 4<br>THICKNESS: .125                                                                                              | ENGR:                             |  |                                                                                                                                                                                |  |                                           |  |                      |  |           |
| FINISH:<br>NONE                                                                                                                      | HEAT TREAT:<br>YES                |  | SIZE<br>B                                                                                                                                                                      |  | CODE IDENT.NO.<br>57284                   |  | DRAWING NO.<br>S7444 |  | REV.<br>~ |
| DO NOT SCALE DRAWING                                                                                                                 |                                   |  | SCALE                                                                                                                                                                          |  |                                           |  | SHEET 2 OF 15        |  |           |
