# Supplementary material
Source: publisher site journal article supplement (https://cdn.bio-protocol.org/journal/static/5077_Supplementary%20information.zip)
Supplement: Supplementary file 1 [file 5077_Supplementary%20information.zip › Supplementary information/Supplemental File S3.pdf]

**Supplementary Table 1: Calibration Data for MF Strength vs. Power****Supply Parameters**

| Voltage (V) | B_xyz ( $\mu$ T) | Voltage (V)_2 | B_xyz ( $\mu$ T)_2 |
|-------------|------------------|---------------|--------------------|
| 0.11        | 9.02             | 3.61          | 272.28             |
| 0.21        | 16.46            | 3.71          | 279.64             |
| 0.31        | 23.97            | 3.81          | 286.8              |
| 0.41        | 31.48            | 3.91          | 294.43             |
| 0.51        | 38.97            | 4.01          | 300.57             |
| 0.61        | 46.39            | 4.11          | 309.42             |
| 0.71        | 53.7             | 4.21          | 316.96             |
| 0.81        | 61.12            | 4.31          | 324.5              |
| 0.91        | 68.47            | 4.41          | 332.04             |
| 1.01        | 75.5             | 4.51          | 339.58             |
| 1.11        | 82.8             | 4.61          | 347.12             |
| 1.21        | 89.89            | 4.71          | 354.66             |
| 1.31        | 97.08            | 4.81          | 362.2              |
| 1.41        | 104.46           | 4.91          | 369.74             |
| 1.51        | 111.76           | 5.01          | 377.28             |
| 1.61        | 118.8            | 5.11          | 384.82             |
| 1.71        | 126.2            | 5.21          | 392.36             |
| 1.81        | 133.8            | 5.31          | 399.9              |
| 1.91        | 141.54           | 5.41          | 407.44             |
| 2.01        | 149.28           | 5.51          | 414.98             |
| 2.21        | 164.78           | 5.71          | 430.06             |
| 2.41        | 180.32           | 5.91          | 445.14             |
| 2.61        | 195.7            | 6.11          | 460.22             |

|      |        |      |        |
|------|--------|------|--------|
| 2.81 | 211.22 | 6.31 | 475.3  |
| 3.01 | 226.63 | 6.51 | 490.38 |
| 3.21 | 241.89 | 6.71 | 505.46 |
| 3.31 | 249.66 | 6.81 | 513.0  |
| 3.41 | 257.4  | 6.91 | 520.54 |
| 3.51 | 264.87 | 7.01 | 528.08 |

DAQami software was used to record and analyze the data.
