# Supplementary material
Source: publisher site journal article supplement (https://cdn.bio-protocol.org/journal/static/5077_Supplementary%20information.zip)
Supplement: Supplementary file 1 [file 5077_Supplementary%20information.zip › Supplementary information/Supplemental File S4.pdf]

**Secondary MF Shielding Designs for Hypomagnetic Fields.** The two secondary containment enclosures provided in this file are an additional option (in place of the 4 in x 4 in x 4 in cardboard shipping box suggested in the protocol) for testing hypomagnetic ( $< 10 \mu\text{T}$ ), near-zero field effects.

### **Circular Hypomagnetic Box Design:**

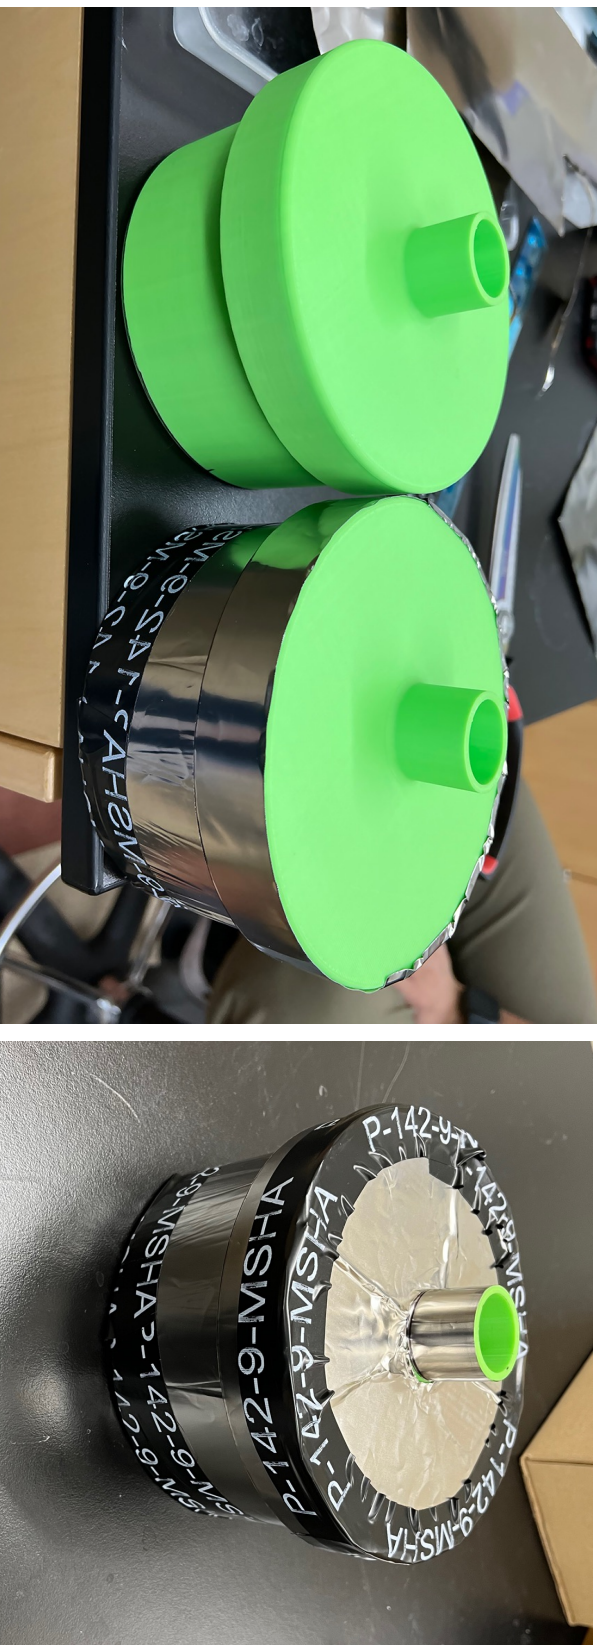

3D printed circular containment option of dimensions: 3.1 in (h) x 5 in diameter, with a 1.2 in diameter opening for cable access. Photos show container with lid prior to foil (left), in the process of having the mu-metal foil added (middle), and the completed container. The black lettered tape (optional) was added to cover the sharp edges of the mu-metal foil for safety (any type of non-conductive tape can be used).

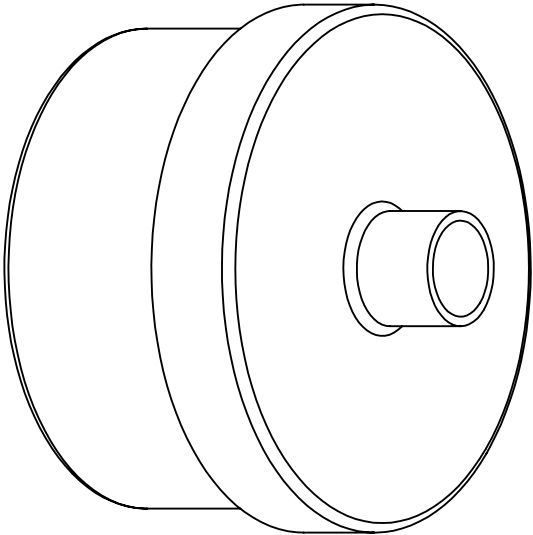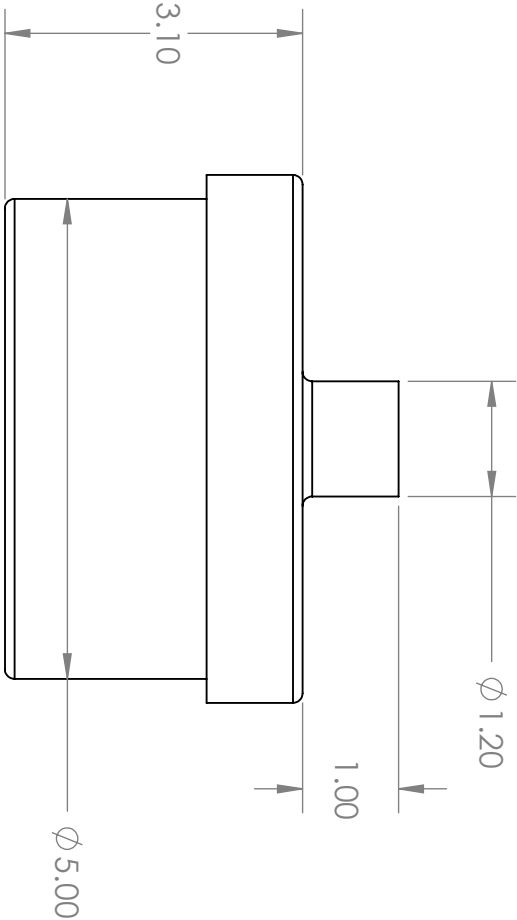

**PROPRIETARY AND CONFIDENTIAL**  
THE INFORMATION CONTAINED IN THIS  
DRAWING IS THE SOLE PROPERTY OF  
<INSERT COMPANY NAME HERE>. ANY  
REPRODUCTION IN PART OR AS A WHOLE  
WITHOUT THE WRITTEN PERMISSION OF  
<INSERT COMPANY NAME HERE> IS  
PROHIBITED.

|             |         |                             |  |           |      |
|-------------|---------|-----------------------------|--|-----------|------|
|             |         | UNLESS OTHERWISE SPECIFIED: |  |           |      |
|             |         | DIMENSIONS ARE IN INCHES    |  | DRAWN     | NAME |
|             |         | TOLERANCES:                 |  | CHECKED   | DATE |
|             |         | FRACTIONAL ±                |  |           |      |
|             |         | ANGULAR: MACH ± BEND ±      |  | ENG APPR. |      |
|             |         | TWO PLACE DECIMAL ±         |  |           |      |
|             |         | THREE PLACE DECIMAL ±       |  | MFG APPR. |      |
|             |         | INTERPRET GEOMETRIC         |  | Q.A.      |      |
|             |         | TOLERANCING PER:            |  | COMMENTS: |      |
|             |         | MATERIAL                    |  |           |      |
|             |         | FINISH                      |  |           |      |
| NEXT ASSY   | USED ON |                             |  |           |      |
| APPLICATION |         | DO NOT SCALE DRAWING        |  |           |      |
|             |         | SCALE: 1:4                  |  |           |      |
|             |         | WEIGHT:                     |  |           |      |
|             |         | SHEET 1 OF 1                |  |           |      |

## Square Hypomagnetic Box Design

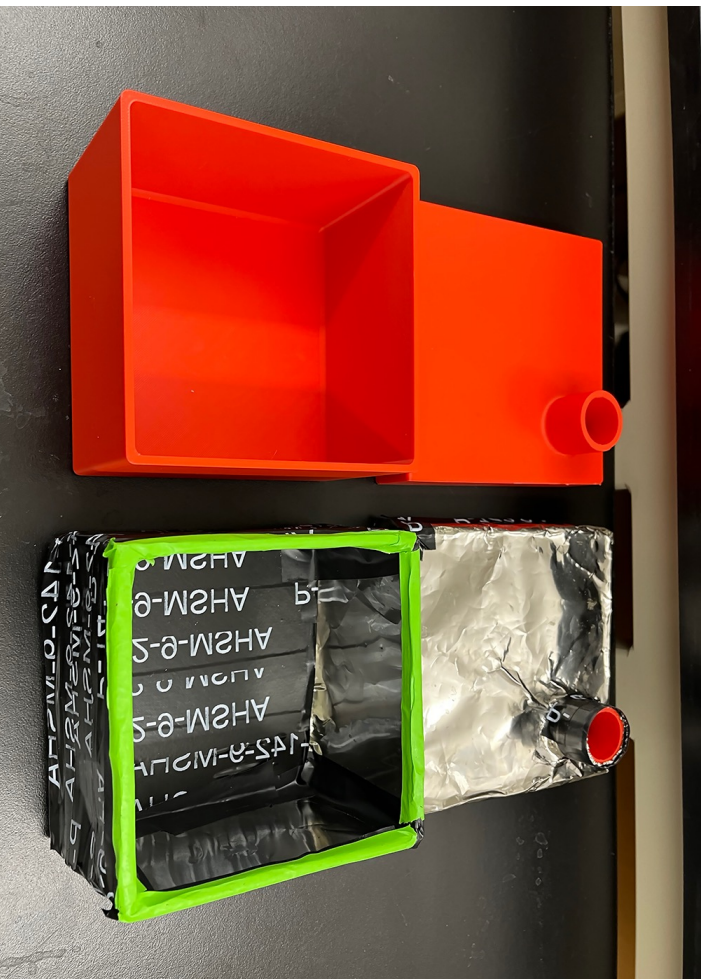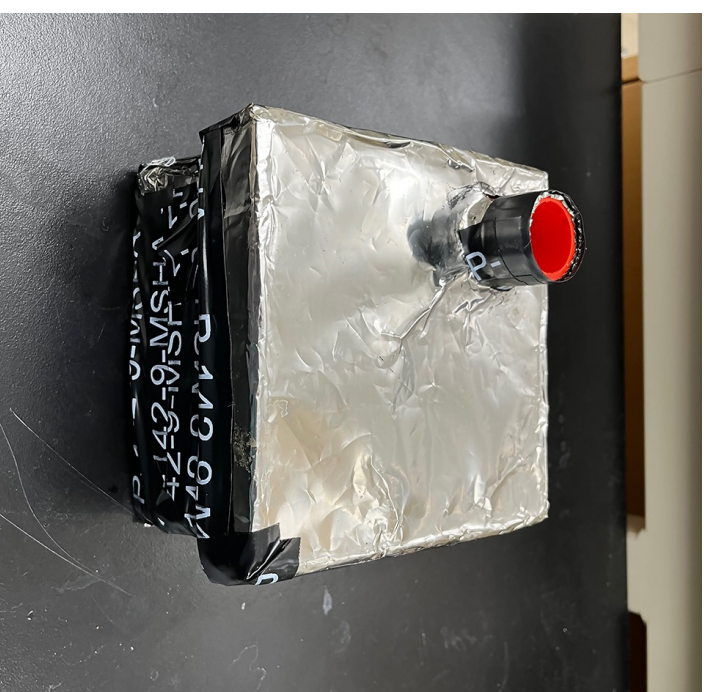

3D printed square containment option of dimensions: 5.2 in x 5.2 in x 3 in, with a 1 in diameter opening. Photos show lid and inside of container prior to foil (left), lid and inside after adding mu-metal foil to both outside and inside surfaces (middle), and the finished container (right). The black lettered tape (optional) was added to cover the sharp edges of the mu-metal foil for safety (any type of non-conductive tape can be used).

Sheet metal aluminum fabricated box with lid

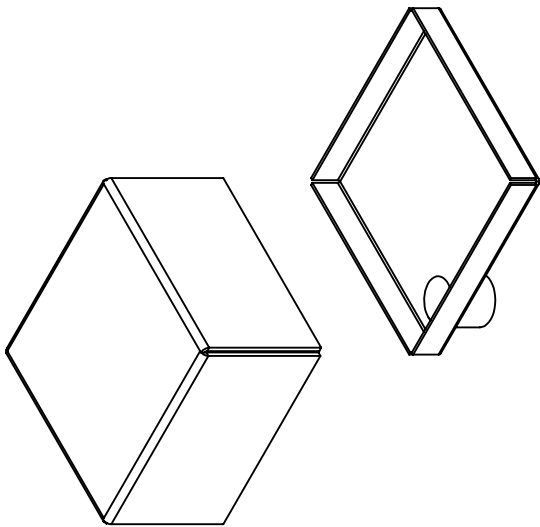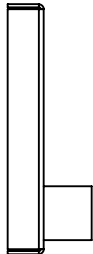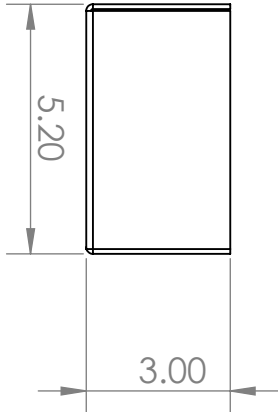

1.000 Diameter pass through

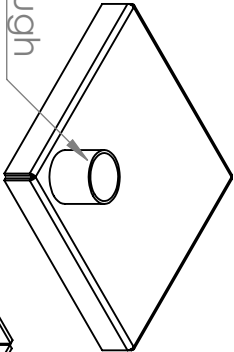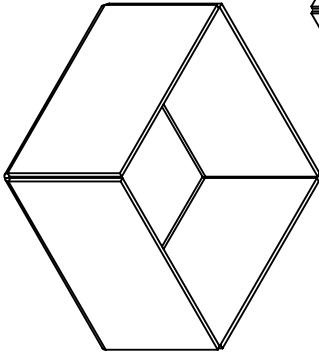

Lid features a pass through to allow instrument wiring to pass while reducing magnetic fields within the box

|             |  |                             |  |           |  |      |  |
|-------------|--|-----------------------------|--|-----------|--|------|--|
|             |  | UNLESS OTHERWISE SPECIFIED: |  |           |  |      |  |
|             |  | DIMENSIONS ARE IN INCHES    |  | DRAWN     |  | NAME |  |
|             |  | TOLERANCES:                 |  | CHECKED   |  | DATE |  |
|             |  | FRACTIONAL ±                |  | ENG APPR. |  |      |  |
|             |  | ANGULAR: MACH ± BEND ±      |  | MFG APPR. |  |      |  |
|             |  | TWO PLACE DECIMAL ±         |  |           |  |      |  |
|             |  | THREE PLACE DECIMAL ±       |  |           |  |      |  |
|             |  | INTERPRET GEOMETRIC         |  | Q.A.      |  |      |  |
|             |  | TOLERANCING PER:            |  | COMMENTS: |  |      |  |
|             |  | MATERIAL                    |  |           |  |      |  |
|             |  | FINISH                      |  |           |  |      |  |
| NEXT ASSY   |  | USED ON                     |  |           |  |      |  |
| APPLICATION |  | DO NOT SCALE DRAWING        |  |           |  |      |  |

SCALE: 1:4

WEIGHT:

SHEET 1 OF 1

PROPRIETARY AND CONFIDENTIAL

THE INFORMATION CONTAINED IN THIS DRAWING IS THE SOLE PROPERTY OF <INSERT COMPANY NAME HERE>. ANY REPRODUCTION IN PART OR AS A WHOLE WITHOUT THE WRITTEN PERMISSION OF <INSERT COMPANY NAME HERE> IS PROHIBITED.

## Final MagShield Apparatus Setup Using Secondary Hypomagnetic Enclosure:

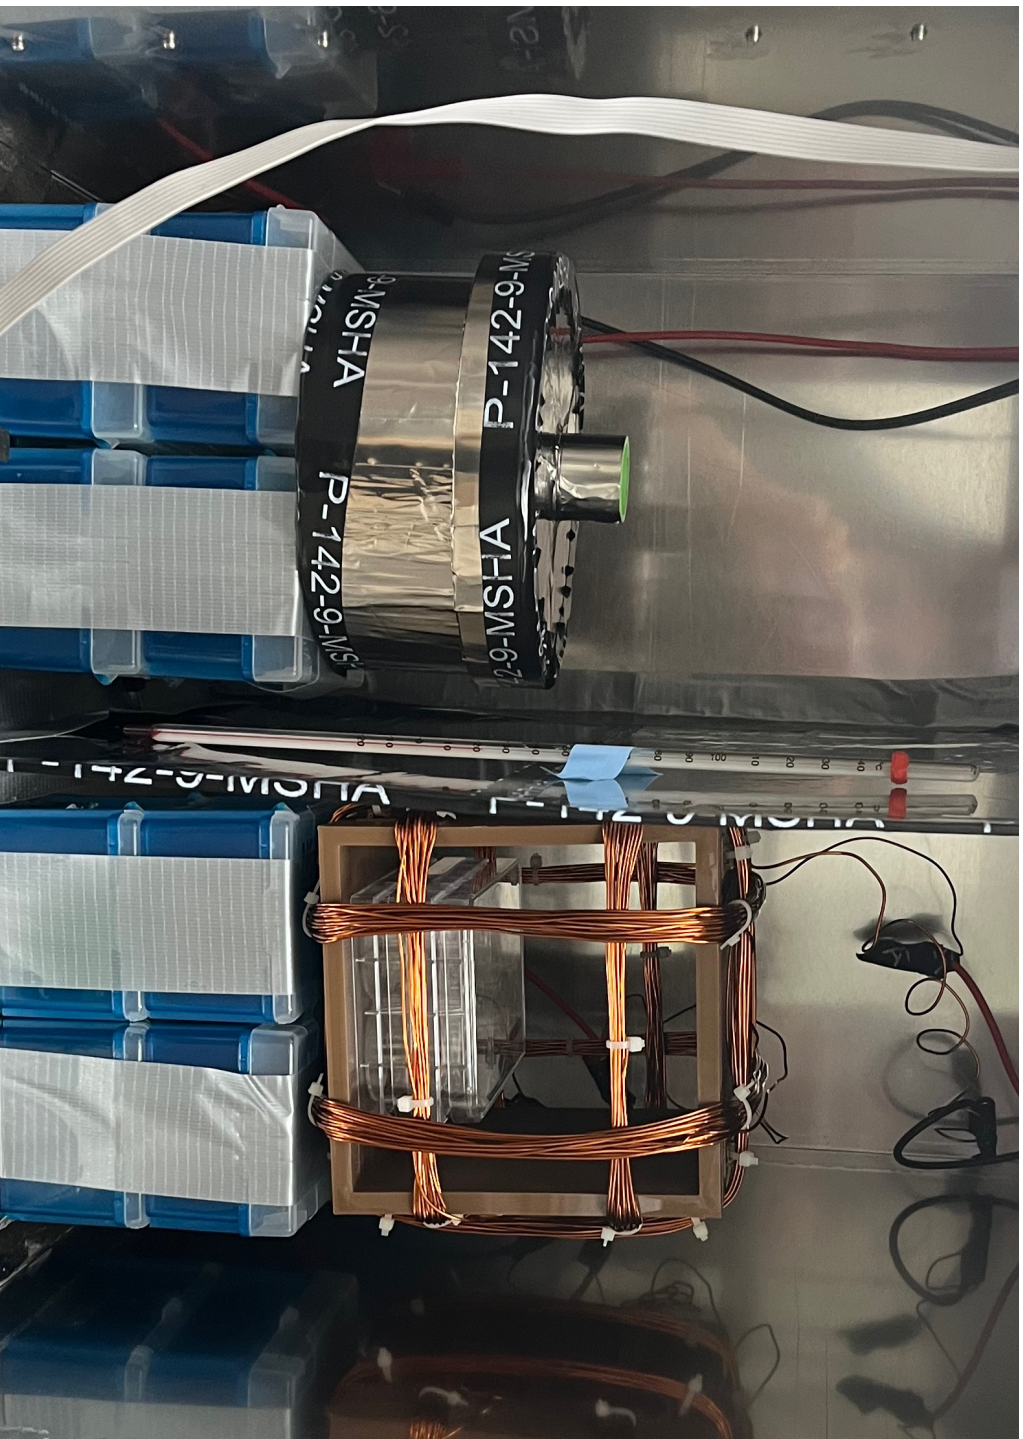

Photo shows MagShield Apparatus ready for hypomagnetic experiment. On the left is the circular secondary container enclosure placed in the center of the left chamber (white cable to the far left is from the milligauss meter). On the right is the control chamber setup with a Helmholtz coil for 45  $\mu$ T exposures placed in the center of the right chamber..
