# Supplementary material
Source: publisher site journal article supplement (https://cdn.bio-protocol.org/journal/static/5077_Supplementary%20information.zip)
Supplement: Supplementary file 1 [file 5077_Supplementary%20information.zip › Supplementary information/Supplemental File S5.pdf]

**Supplementary Table 2: Temperature Fluctuations at Different Magnetic Field Strengths**

| Experiment | Treated Group B ( $\mu\text{T}$ ) | Treated Group T ( $^{\circ}\text{C}$ ) | Control Group B ( $\mu\text{T}$ ) | Control Group T ( $^{\circ}\text{C}$ ) | $\Delta\text{T}$ ( $^{\circ}\text{C}$ ) |
|------------|-----------------------------------|----------------------------------------|-----------------------------------|----------------------------------------|-----------------------------------------|
| I          | 0.5                               | 36.94                                  | 0.5                               | 36.94                                  | 0.0                                     |
| II         | 45.0                              | 36.96                                  | 0.72                              | 36.94                                  | 0.02                                    |
| III        | 100.0                             | 37.09                                  | 45.0                              | 37.03                                  | 0.06                                    |
| IV         | 200.0                             | 37.15                                  | 45.0                              | 37.06                                  | 0.09                                    |
| V          | 300.0                             | 37.17                                  | 45.0                              | 37.08                                  | 0.09                                    |
| VI         | 400.0                             | 37.25                                  | 45.0                              | 37.11                                  | 0.14                                    |
| VII        | 500.0                             | 37.38                                  | 45.0                              | 37.15                                  | 0.23                                    |
| VIII       | 600.0                             | 37.45                                  | 45.0                              | 37.16                                  | 0.29                                    |
| IX         | 700.0                             | 37.56                                  | 45.0                              | 37.18                                  | 0.38                                    |
| X          | 800.0                             | 37.61                                  | 45.0                              | 37.19                                  | 0.42                                    |
| XI         | 900.0                             | 37.74                                  | 45.0                              | 37.23                                  | 0.51                                    |
| XII        | 1000.0                            | 37.91                                  | 45.0                              | 37.28                                  | 0.63                                    |
| XIII       | 1100.0                            | 38.05                                  | 45.0                              | 37.32                                  | 0.73                                    |

J-type thermocouples were used to measure temperature changes and DAQami software was used to record and analyze the data.
